# Supplementary material
Source: bioRxiv or medRxiv preprint supplement (https://medrxiv.org/highwire/filestream/69814/field_highwire_adjunct_files/0/19002436-1.pdf)

## **Supplemental Material**

### **Supplemental Text**

### **Supplemental Tables**

**Supplemental Table S1** - Fit indexes of the unidimensional models for irritability, outbursts and impairment Confirmatory Factor Analysis Models

**Supplemental Table S2** – Factor Loadings and Category Threshold parameters for items in the Irritable Mood section

**Supplemental Table S3** - Factor Loadings and Category Threshold parameters for items in the Temper Outbursts section

**Supplemental Table S4** - Factor Loadings and Category Threshold parameters for items in the Impairment section

**Supplemental Table S5** – Latent Class Model Fit Indexes and Entropy for each four latent class solutions for irritable mood, outbursts and impairment items

**Supplemental Table S6** - Fit indexes of the unidimensional, correlated and bifactor models of irritable mood and temper outbursts

**Supplemental Table S7** - Irritable mood, outburst and impairment items and their categories of response as described in DMDD section of DAWBA questionnaire

**Supplemental Table S8** - Left Censored regression comparing DMDD groups in SDQ scores

**Supplemental Table S9** - Psychiatric comorbidities in Disruptive Mood Dysregulation Disorder defined using different combination rules for the irritable mood and temper outburst domains

## **Supplemental Figures**

**Supplemental Figure S1** – Latent Class Clinical Indicator endorsement distribution between classes with low and high levels of irritable mood, outbursts and impairment

**Supplemental Figure S2** – Receiver Operating Curve for predicting latent classes of subjects with high levels of irritable mood, outbursts and impairment

**Supplemental Figure S3** – Comparison between Strengths and Difficulties Questionnaire Scores between Typically Developing Pre-Adolescents/Early Adolescents, Pre-Adolescents/Early Adolescents with other disorders, with irritable mood, outbursts and combined Disruptive Mood Dysregulation Disorder.

**Supplemental Figure S4** – Comparison between Strengths and Difficulties Questionnaire Scores between Disruptive Mood Dysregulation Disorder and Matched controls for psychiatric comorbidity using the OR rule.

**Supplemental Figure S5** – Comparison between Strengths and Difficulties Questionnaire Scores between Disruptive Mood Dysregulation Disorder and Matched controls for psychiatric comorbidity using the AND rule.

## **Supplemental code**

**Supplemental code 1** – Symptomatic thresholds

**Supplemental code 2** – Syndromic thresholds

**Supplemental code 3** – Clinical operationalization

## **Supplemental Text**

### *Fit Indexes for Confirmatory Factor Analysis*

For all CFA unidimensional models, we used delta parameterization and weighted least-square parameters using a diagonal weight matrix with standard errors and with mean and variance-adjusted chi-square test statistics (WLSMV) estimators. The measures of goodness of fit were assessed through the following fit indices: chi-square, SRMR (standardized root mean square residual), CFI (comparative fit index), TLI (Tucker-Lewis Index) and RMSEA, (root mean square error of approximation). To demonstrate good fit to the data, an estimated model should have a SRMR near or below 0.08, a RMSEA of near or below 0.06 and CFI and TLI near or above 0.95 (Hu & Bentler, 1999). Details about the estimators and the model fit used in this study can be found in Supplemental Table S1, which provides the fit indexes of the unidimensional models for irritability, outbursts and impairment items.

## **References**

- Hu, L., & Bentler, P. M. (1999). Cutoff criteria for fit indexes in covariance structure analysis: Conventional criteria versus new alternatives. *Structural Equation Modeling: A Multidisciplinary Journal*, 6(1), 1–55. <https://doi.org/10.1080/10705519909540118>

**Supplemental Table S1** - Fit indices of the unidimensional irritable mood, outbursts and impairment Confirmatory Factor Analysis Models

| <b>Fit indexes</b> | <b>Irritable Mood*</b>       | <b>Outbursts**</b>           | <b>Impairment</b>           |
|--------------------|------------------------------|------------------------------|-----------------------------|
| FP                 | 27                           | 44                           | 16                          |
| $\chi^2$           | 3254.236<br>(df=28; p<0.001) | 3352.504<br>(df=91; p<0.001) | 2865.135<br>(df=6; p<0.001) |
| RMSEA              | 0.057                        | 0.057                        | 0.032                       |
| CI 90%             | 0.040- 0.074                 | 0.047-0.068                  | 0.000-0.088                 |
| CFI                | 0.989                        | 0.968                        | 1.000                       |
| TLI                | 0.984                        | 0.961                        | 0.999                       |
| SRMR               | 0.057                        | 0.085                        | 0.019                       |

Note: FP: Free Parameters;  $\chi^2$ : Robust Chi Square Difference Test; df: degrees of freedom; RMSEA: Root Mean Square Error of Approximation; CI: Confidence Interval; CFI, Comparative Fit Index; TLI, Tucker-Lewis Index; SRMR: Standardized Root Mean Square Residual. \* Items p1y12b-p1y12c allowed to correlated due to similar item content/context; \*\* Items p1y4b-p1y4c and p1y3b-p1y3c allowed to correlated due to correlated due to similar item content/context

**Supplemental Table S2** – Factor Loadings and Category Threshold parameters for items in the Irritable Mood section

| Items (item code in DAWBA)        | Factor Loadings | T1                  | T2               | T3                         | T4               | Location (mean) | Location rank |
|-----------------------------------|-----------------|---------------------|------------------|----------------------------|------------------|-----------------|---------------|
| <i>Frequency/duration</i>         |                 |                     |                  |                            |                  |                 |               |
| Frequency of irritable/angry mood |                 | <b>Occasionally</b> | <b>1-2/week</b>  | $\geq$ <b>3/week</b>       | <b>Every day</b> |                 |               |
|                                   | 0.495           |                     |                  | 0.078                      | <b>1.143</b>     | 0.611           | 4             |
| Long duration of irritability     |                 | <b>&lt;1hr</b>      | <b>Few hours</b> | <b>Most/all of the day</b> |                  |                 |               |
|                                   | 0.420           | 0.053               | <b>0.98</b>      | <b>1.726</b>               |                  | 0.920           | 6             |
| <i>Characteristics</i>            |                 |                     |                  |                            |                  |                 |               |
| Easily irritated                  | 0.905           | -0.138              | <b>0.775</b>     |                            |                  | 0.319           | 3             |
| Intense irritability              | 0.910           | 0.281               | <b>0.973</b>     |                            |                  | 0.627           | 5             |
| <i>Settings</i>                   |                 |                     |                  |                            |                  |                 |               |
| At home                           | 0.624           | -2.123              | 0.303            |                            |                  | -0.910          | 1             |
| In the classroom                  | 0.292           | 0.471               | <b>1.521</b>     |                            |                  | 0.996           | 7             |

|                                |       |                 |                 |                     |        |   |
|--------------------------------|-------|-----------------|-----------------|---------------------|--------|---|
| With peers                     | 0.423 | 0.438           | <b>1.608</b>    |                     | 1.023  | 8 |
|                                |       |                 | <b>A medium</b> |                     |        |   |
| Irritability evident to others |       | <b>A little</b> | <b>amount</b>   | <b>A great deal</b> |        |   |
|                                | 0.437 | -1.345          | -0.095          | <b>1.256</b>        | -0.061 | 2 |

---

Note: T1= First threshold; T2 = Second threshold; T3 = Third threshold; T4 = Fourth threshold.

**Supplemental Table S3** - Factor Loadings and Category Threshold parameters for items in the Temper Outbursts section

| Items (item code in DAWBA)           | Factor Loadings | T1                  | T2              | T3              | T4               | Location (mean) | Location rank |
|--------------------------------------|-----------------|---------------------|-----------------|-----------------|------------------|-----------------|---------------|
| <i>Frequency/duration</i>            |                 |                     |                 |                 |                  |                 |               |
| Frequency of outbursts               |                 | <b>Occasionally</b> | <b>1-2/week</b> | <b>≥ 3/week</b> | <b>Every day</b> |                 |               |
|                                      | 0.565           |                     |                 | -0.068          | <b>1.129</b>     | -0.424          | 5             |
| <i>Characteristics</i>               |                 |                     |                 |                 |                  |                 |               |
|                                      |                 | <b>A little</b>     | <b>A lot</b>    |                 |                  |                 |               |
| Slamming doors                       | 0.525           | -0.893              | 0.333           |                 |                  | -0.274          | 6             |
| Shouting                             | 0.550           | -1.004              | 0.062           |                 |                  | -0.472          | 4             |
| Swearing                             | 0.693           | -1.129              | -0.015          |                 |                  | -0.572          | 3             |
| Saying mean things to others         | 0.743           | -0.548              | 0.259           |                 |                  | -0.143          | 7             |
| Saying negative things about himself | 0.481           | <b>0.633</b>        | <b>1.316</b>    |                 |                  | 0.981           | 10            |
| Physical aggression to others        | 0.619           | 0.050               | <b>1.086</b>    |                 |                  | 0.576           | 9             |
| Deliberate self-harm                 | 0.527           | <b>1.211</b>        | <b>2.030</b>    |                 |                  | 1.626           | 14            |
| Breaking things                      | 0.572           | <b>0.562</b>        | <b>1.471</b>    |                 |                  | 1.023           | 11            |

| <i>Settings</i>       |        | <b>A little</b> | <b>A lot</b>      |        |    |
|-----------------------|--------|-----------------|-------------------|--------|----|
| At home               | 0.722  | -2.597          | 0.068             | -1.264 | 1  |
| In the classroom      | 0.351  | <b>0.604</b>    | <b>1.628</b>      | 1.123  | 13 |
| With peers            | 0.372  | 0.448           | <b>1.585</b>      | 1.024  | 12 |
| <i>Triggers</i>       |        |                 |                   |        |    |
| Recognizable triggers |        | <b>Perhaps</b>  | <b>Definitely</b> |        |    |
|                       | -0.193 | -0.815          | -0.403            | -0.610 | 2  |
| Easily triggered      |        | <b>A little</b> | <b>A lot</b>      |        |    |
|                       | 0.664  | -0.109          | <b>0.784</b>      | 0.347  | 9  |

Note: T1 = First threshold; T2= Second threshold; T3= Third threshold; T4 = Fourth threshold.



**Supplemental Table S4** - Factor Loadings and Category Threshold parameters for items in the Impairment section

| <b>Items</b>          | <b>Factor Loadings</b> | <b>T1</b>       | <b>T2</b>              | <b>T3</b>           | <b>Location (mean)</b> | <b>Location rank</b> |
|-----------------------|------------------------|-----------------|------------------------|---------------------|------------------------|----------------------|
|                       |                        | <b>A little</b> | <b>A medium amount</b> | <b>A great deal</b> |                        |                      |
| Impact on family life | 0.709                  | 0.018           | <b>1.036</b>           | <b>2.109</b>        | 1.054                  | 1                    |
| Impact on friendship  | 0.903                  | <b>0.545</b>    | <b>1.434</b>           | <b>2.376</b>        | 1.452                  | 3                    |
| Impact on learning    | 0.825                  | <b>0.601</b>    | <b>1.238</b>           | <b>2.443</b>        | 1.427                  | 2                    |
| Impact on leisure     | 0.826                  | <b>0.672</b>    | <b>1.521</b>           | <b>2.757</b>        | 1.650                  | 4                    |

Note: T1 = First threshold; T2 = Second threshold; T3 = Third threshold.

**Table S5** – Latent Class Model Fit Indexes and Entropy for each of the four latent class solutions for irritable mood, outbursts and impairment items

---

**Irritable Mood**

| Model          | log-likelihood    | resid. Df  | BIC             | aBIC            | cAIC            | likelihood-ratio | Entropy      |
|----------------|-------------------|------------|-----------------|-----------------|-----------------|------------------|--------------|
| Model 1        | -1.296.125        | 120        | 2.634.154       | 2.611.943       | 2.641.154       | 324.66270        | -            |
| <b>Model 2</b> | <b>-1.191.353</b> | <b>112</b> | <b>2472.502</b> | <b>2424.906</b> | <b>2487.502</b> | <b>115.11877</b> | <b>0.886</b> |
| Model 3        | -1173.152         | 104        | 2483.992        | 2411.012        | 2506.992        | 78.71695         | 0.98         |
| Model 4        | -1167.479         | 96         | 2520.538        | 2422.173        | 2551.538        | 67.37120         | 0.948        |

---

**Outbursts**

| Model          | log-likelihood   | resid. Df  | BIC             | aBIC            | cAIC            | likelihood-ratio | Entropy      |
|----------------|------------------|------------|-----------------|-----------------|-----------------|------------------|--------------|
| Model 1        | -1501.228        | 247        | 3050.347        | 3024.963        | 3058.347        | 335.1590         | -            |
| <b>Model 2</b> | <b>-1435.849</b> | <b>238</b> | <b>2973.468</b> | <b>2919.527</b> | <b>2990.468</b> | <b>204.4022</b>  | <b>0.665</b> |
| Model 3        | -1424.724        | 229        | 3005.096        | 2922.597        | 3031.096        | 182.1518         | 0.634        |
| Model 4        | -1412.391        | 220        | 3034.308        | 2923.251        | 3069.308        | 157.4852         | 0.719        |

---

**Impairment**

| Model   | log-likelihood | resid. Df | BIC      | aBIC     | cAIC     | likelihood-ratio | Entropy |
|---------|----------------|-----------|----------|----------|----------|------------------|---------|
| Model 1 | -1015.8047     | 11        | 2055.555 | 2042.863 | 2059.555 | 307.99668133     | -       |

|                |                  |          |                 |                 |                 |                    |              |
|----------------|------------------|----------|-----------------|-----------------|-----------------|--------------------|--------------|
| <b>Model 2</b> | <b>-872.9925</b> | <b>6</b> | <b>1799.863</b> | <b>1771.306</b> | <b>1808.863</b> | <b>22.37226443</b> | <b>0.789</b> |
| Model 3        | -866.3003        | 1        | 1816.411        | 1771.988        | 1830.411        | 8.98796565         | 0.661        |
| Model 4        | -861.8353        | -4       | 1837.413        | 1777.125        | 1856.413        | 0.05789396         | 0.738        |

---

**Note:** BIC, Bayesian Information Criterion; aBIC, adjusted Bayesian Information Criteria; cAIC,

Consistent Akaike Information Criterion; df, degrees of freedom

**Supplemental Table S6** - Fit indices of the unidimensional, correlated and bifactor models of irritable mood and temper outbursts (n=398)

| <b>Fit indexes</b> | <b>Unidimensional</b> | <b>Correlated with two dimensions</b> | <b>Bifactor*</b> |
|--------------------|-----------------------|---------------------------------------|------------------|
| FP                 | 31                    | 32                                    | 46               |
| $\chi^2$           | 241.4                 | 231.625                               | 124.387          |
| RMSEA              | 0.066                 | 0.064                                 | 0.041            |
| CI 90%             | 0.056-0.076           | 0.054-0.074                           | 0.028- 0.054     |
| CFI                | 0.926                 | 0.930                                 | 0.975            |
| TLI                | 0.847                 | 0.917                                 | 0.965            |
| SRMR               | 0.136                 | 0.134                                 | 0.103            |

Note: FP: Free Parameters;  $\chi^2$ : Robust Chi Square Difference Test; df: degrees of freedom; RMSEA: Root Mean Square Error of Approximation; CI: Confidence Interval; CFI, Comparative Fit Index; TLI, Tucker-Lewis Index; SRMR: Standardized Root Mean Square Residual;

\* The bifactor model resulted in negative residual variances and items with negative factor loadings in specific domains and, therefore, this model was not considered further in the analysis.

**Supplemental Table S7** - Irritable mood, outburst and impairment items and their response categories as described in DMDD section of the DAWBA questionnaire

| DAWBA Questionnaire Items                                           | Response categories        |                   |              |                 |           |
|---------------------------------------------------------------------|----------------------------|-------------------|--------------|-----------------|-----------|
| <b>Irritable Mood Section</b>                                       |                            |                   |              |                 |           |
| Frequency of irritable/angry mood (p1y1)                            | Never                      | Occasionally      | 1-2/week     | ≥ 3/week        | Every day |
| Easily irritated (p1y8)                                             | No                         | A little          | A lot        |                 |           |
| Intense irritability (p1y9)                                         | No                         | A little          | A lot        |                 |           |
| Long duration of irritability (p1y10)                               | No more than a few minutes | Less than an hour | A few hours  | A medium amount |           |
| Irritability evident to others (p1y11)                              | Not at all                 | A little          | A great deal |                 |           |
| At home (p1y12a)                                                    | No                         | A little          | A lot        |                 |           |
| In the classroom (p1y12b)                                           | No                         | A little          | A lot        |                 |           |
| With peers (p1y12c)                                                 | No                         | A little          | A lot        |                 |           |
| Angry weeks (irritable most of the day, nearly every day) * (p1y13) | No                         | Yes               |              |                 |           |
| <b>Outbursts Section</b>                                            |                            |                   |              |                 |           |
| Frequency of outbursts (p1y2)                                       | Never                      | Occasionally      | 1-2/week     | ≥ 3/week        | Every day |

|                                                 |                    |                     |                      |            |                       |
|-------------------------------------------------|--------------------|---------------------|----------------------|------------|-----------------------|
| Slamming doors (p1y3a)                          | No                 | A little            | A lot                |            |                       |
| Shouting (p1y3b)                                | No                 | A little            | A lot                |            |                       |
| Swearing (p1y3c)                                | No                 | A little            | A lot                |            |                       |
| Saying mean things to others (p1y3d)            | No                 | A little            | A lot                |            |                       |
| Saying negative things about himself<br>(p1y3e) | No                 | A little            | A lot                |            |                       |
| Physical aggression to others (p1y3f)           | No                 | A little            | A lot                |            |                       |
| Deliberate self-harm (p1y3g)                    | No                 | A little            | A lot                |            |                       |
| Breaking things (p1y3h)                         | No                 | A little            | A lot                |            |                       |
| At home (p1y4a)                                 | No                 | A little            | A lot                |            |                       |
| In the classroom (p1y4b)                        | No                 | A little            | A lot                |            |                       |
| With peers (p1y4c)                              | No                 | A little            | A lot                |            |                       |
| Recognizable triggers (p1y5)                    | No                 | Perhaps             | Definitely           |            |                       |
| Easily triggered (p1y6)                         | No                 | A little            | A lot                |            |                       |
| Outburst-free gap in the last year **<br>(p1y7) | Less than<br>a day | Less than a<br>week | Less than a<br>month | 1-3 months | More than 3<br>months |

|                                |            |          |          |              |  |
|--------------------------------|------------|----------|----------|--------------|--|
| <b>Impairment Section</b>      |            |          |          |              |  |
|                                |            |          | A medium |              |  |
| Impact on family life (p1y19a) | Not at all | A little | amount   | A great deal |  |

|                               |            |          |          |              |
|-------------------------------|------------|----------|----------|--------------|
|                               |            |          | A medium |              |
| Impact on friendship (p1y19b) | Not at all | A little | amount   | A great deal |
|                               |            |          | A medium |              |
| Impact on learning (p1y19c)   | Not at all | A little | amount   | A great deal |
|                               |            |          | A medium |              |
| Impact on leisure (p1y19d)    | Not at all | A little | amount   | A great deal |

---

**Note:**

\* The item “angry weeks” was not included because the item “long duration of irritability” already contains the response option that captures “irritable most of the day, nearly every day”.

\*\* Item excluded of the analysis. The rationale for excluding this item is that it is unclear whether we would expect this item to be monotonically related to the overall latent construct given short periods of irritability with large gaps could also inform episodes of irritability (a marker of severity and bipolar disorder in children).

**Supplemental Table S8** - Left Censored regression comparing DMDD groups in SDQ

scores

|                          | Contrast with TDC |      |         | Contrast with Other DSM-5 Disorders |      |         |
|--------------------------|-------------------|------|---------|-------------------------------------|------|---------|
|                          | MD                | SE   | p-value | MD                                  | SE   | p-value |
| <b>SDQ: Total</b>        |                   |      |         |                                     |      |         |
| Other disorders          | 9.54              | 0.35 | <0.001  | -                                   | -    | -       |
| Irritable mood only      | 12.12             | 0.94 | <0.001  | 2.57                                | 1.07 | 0.016   |
| Outbursts only           | 13.42             | 1.23 | <0.001  | 3.87                                | 1.37 | 0.005   |
| Combined                 | 15.56             | 0.89 | <0.001  | 6.02                                | 1.02 | <0.001  |
| <b>SDQ: Emotional</b>    |                   |      |         |                                     |      |         |
| Other disorders          | 2.75              | 0.16 | <0.001  | -                                   | -    | -       |
| Irritable mood only      | 2.94              | 0.42 | <0.001  | 0.19                                | 0.49 | 0.694   |
| Outbursts only           | 2.46              | 0.55 | <0.001  | -0.28                               | 0.63 | 0.657   |
| Combined                 | 3.31              | 0.40 | <0.001  | 0.56                                | 0.04 | 0.234   |
| <b>SDQ: Hyperkinetic</b> |                   |      |         |                                     |      |         |
| Other disorders          | 3.65              | 0.21 | <0.001  | -                                   | -    | -       |
| Irritable mood only      | 4.50              | 0.54 | <0.001  | 0.85                                | 0.53 | 0.113   |
| Outbursts only           | 5.38              | 0.71 | <0.001  | 1.73                                | 0.68 | 0.011   |



|          |      |      |        |      |      |        |
|----------|------|------|--------|------|------|--------|
| Combined | 5.35 | 0.52 | <0.001 | 1.69 | 0.04 | <0.001 |
|----------|------|------|--------|------|------|--------|

**SDQ: Conduct**

|                 |      |       |        |   |   |   |
|-----------------|------|-------|--------|---|---|---|
| Other disorders | 2.81 | 0.162 | <0.001 | - | - | - |
|-----------------|------|-------|--------|---|---|---|

|                     |      |       |        |      |      |       |
|---------------------|------|-------|--------|------|------|-------|
| Irritable mood only | 3.96 | 0.416 | <0.001 | 1.16 | 0.46 | 0.111 |
|---------------------|------|-------|--------|------|------|-------|

|                |      |       |        |      |      |        |
|----------------|------|-------|--------|------|------|--------|
| Outbursts only | 5.13 | 0.547 | <0.001 | 2.33 | 0.59 | <0.001 |
|----------------|------|-------|--------|------|------|--------|

|          |      |       |        |      |      |        |
|----------|------|-------|--------|------|------|--------|
| Combined | 5.71 | 0.396 | <0.001 | 2.91 | 0.39 | <0.001 |
|----------|------|-------|--------|------|------|--------|

**SDQ: Peer relationships**

|                 |      |      |        |   |   |   |
|-----------------|------|------|--------|---|---|---|
| Other disorders | 2.42 | 0.17 | <0.001 | - | - | - |
|-----------------|------|------|--------|---|---|---|

|                     |      |      |        |      |      |       |
|---------------------|------|------|--------|------|------|-------|
| Irritable mood only | 3.11 | 0.43 | <0.001 | 0.69 | 0.48 | 0.146 |
|---------------------|------|------|--------|------|------|-------|

|                |      |      |        |      |      |       |
|----------------|------|------|--------|------|------|-------|
| Outbursts only | 2.82 | 0.57 | <0.001 | 0.40 | 0.62 | 0.514 |
|----------------|------|------|--------|------|------|-------|

|          |      |      |        |      |      |        |
|----------|------|------|--------|------|------|--------|
| Combined | 3.67 | 0.41 | <0.001 | 1.25 | 0.46 | <0.001 |
|----------|------|------|--------|------|------|--------|

**SDQ: Impact**

|                 |      |      |        |   |   |   |
|-----------------|------|------|--------|---|---|---|
| Other disorders | 4.09 | 0.21 | <0.001 | - | - | - |
|-----------------|------|------|--------|---|---|---|

|                     |      |      |        |      |      |       |
|---------------------|------|------|--------|------|------|-------|
| Irritable mood only | 5.35 | 0.47 | <0.001 | 1.22 | 0.45 | 0.006 |
|---------------------|------|------|--------|------|------|-------|

|                |      |      |        |      |      |       |
|----------------|------|------|--------|------|------|-------|
| Outbursts only | 4.51 | 0.63 | <0.001 | 0.42 | 0.59 | 0.711 |
|----------------|------|------|--------|------|------|-------|

|          |      |      |        |      |      |        |
|----------|------|------|--------|------|------|--------|
| Combined | 6.07 | 0.45 | <0.001 | 1.94 | 0.43 | <0.001 |
|----------|------|------|--------|------|------|--------|

---

**Note:** TDC, Typically Developing Comparisons; SDQ, Strengths and Difficulties

Questionnaire; MD, Mean Difference.

**Supplemental Table S9** – Psychiatric comorbidities in Disruptive Mood Dysregulation Disorder defined using different combination rules for the irritable mood and temper outburst domains

| Psychiatric Comorbidities           | Current<br>DMDD<br>(n=86) | Irritable<br>Mood<br>(n= 40) | Outbursts<br>(n=22) | AND<br>Rule<br>(n=44) | OR Rule<br>(n=107) |
|-------------------------------------|---------------------------|------------------------------|---------------------|-----------------------|--------------------|
|                                     | Prevalence Estimation (%) |                              |                     |                       |                    |
| <i>Any disorder (except DMDD)</i>   | 62.8                      | 60.0                         | 56.5                | 79.5                  | 67.3               |
| <i>Any Anxiety Disorder</i>         | 23.3                      | 22.5                         | 13.0                | 31.8                  | 24.3               |
| Generalized Anxiety Disorder        | 5.8                       | 7.5                          | 0                   | 9.1                   | 6.5                |
| Separation Anxiety Disorder         | 7                         | 2.5                          | 4.3                 | 13.6                  | 7.5                |
| Agoraphobia                         | 3.5                       | 2.5                          | 0                   | 4.5                   | 2.8                |
| Panic Disorder                      | 1.2                       | 0                            | 0                   | 2.3                   | 0.9                |
| Social Anxiety Disorder             | 3.5                       | 10.0                         | 0                   | 4.5                   | 5.6                |
| Specific Phobia                     | 11.6                      | 2.5                          | 8.7                 | 15.9                  | 9.3                |
| Other Specified Anxiety Disorder    | 1.2                       | 0                            | 0                   | 0                     | 0                  |
| <i>Any Mood Disorder</i>            | 11.6                      | 17.5                         | 4.3                 | 15.9                  | 14.0               |
| Major Depressive Disorder           | 8.1                       | 12.5                         | 4.3                 | 11.4                  | 10.3               |
| Bipolar Disorder/Mania              | 3.5                       | 7.5                          | 0                   | 2.3                   | 3.7                |
| Other Specified Depressive Disorder | 1.2                       | 2.3                          | 0                   | 2.5                   | 1.9                |

|                                                     |      |      |      |      |      |
|-----------------------------------------------------|------|------|------|------|------|
| <i>Any Attention-Deficit/Hyperactivity Disorder</i> | 44.2 | 30.0 | 34.8 | 50.0 | 39.3 |
| Combined                                            | 29.1 | 17.5 | 17.4 | 31.8 | 23.4 |
| Hyperactive/impulsive                               | 3.5  | 0    | 13.0 | 4.5  | 4.7  |
| Inattentive                                         | 9.3  | 7.5  | 0    | 11.4 | 7.5  |
| Another Specified ADHD                              | 2.3  | 5    | 4.3  | 2.3  | 3.7  |
| <i>Any Disruptive Behavior Disorder</i>             | 20.9 | 20.0 | 34.8 | 38.6 | 30.8 |
| Oppositional Defiant Disorder                       | 0    | 12.5 | 21.7 | 11.4 | 14.0 |
| Conduct Disorder                                    | 18.6 | 10.0 | 17.4 | 27.3 | 18.7 |
| Other Disruptive Behavior Disorder                  | 2.3  | 0    | 4.3  | 4.5  | 2.8  |
| <i>Other Disorders</i>                              |      |      |      |      |      |
| Obsessive-Compulsive Disorder                       | 1.2  | 2.5  | 0    | 2.3  | 1.9  |
| Posttraumatic Stress Disorder                       | 3.5  | 0    | 0    | 4.5  | 1.9  |
| Autism Spectrum Disorder                            | 3.5  | 0    | 4.3  | 6.8  | 3.7  |
| Eating Disorders                                    | 1.2  | 0    | 0    | 2.3  | 0.9  |
| <i>Current DMDD</i>                                 | -    | 37.5 | 39.1 | 84.1 | 57.0 |

Note: DMDD, Disruptive Mood Dysregulation Disorder

**Supplemental Figure S1** – Latent Class Clinical Indicator endorsement distribution between classes with low and high levels of irritable mood, outbursts and impairment

### Irritable Mood

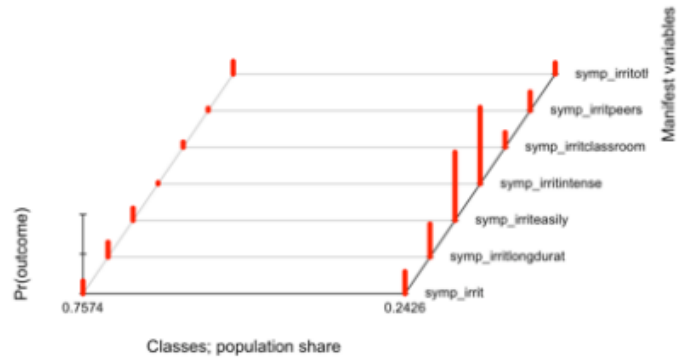

### Outbursts

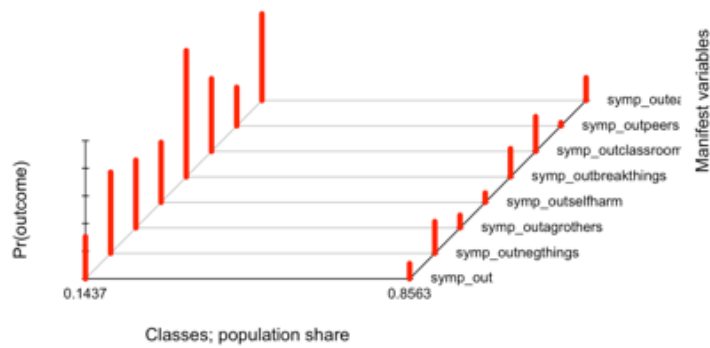

### Impairment

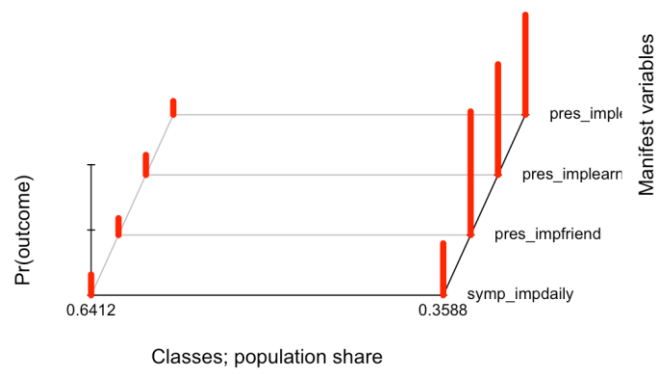

**Note:** Graphs represents the chance of endorsement of each irritability, outburst and impairment clinical indicators between the two latent classes.

**Supplemental Figure S2** – Receiver Operating Curve for predicting latent classes of subjects with high levels of irritable mood, outbursts and impairment

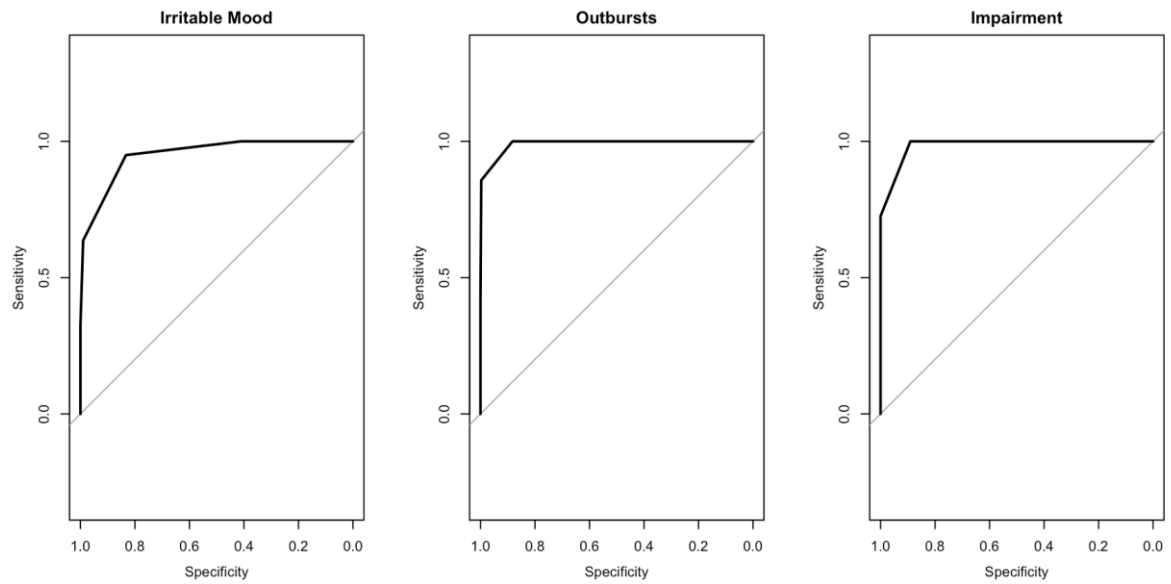

**Supplemental Figure S3** – Comparison of Strengths and Difficulties Questionnaire Scores among Typically Developing Pre-Adolescents/Early Adolescents, Pre-Adolescents/Early Adolescents with non-DMDD disorders, with irritable mood only, outbursts only and both irritable mood and outbursts (combined).

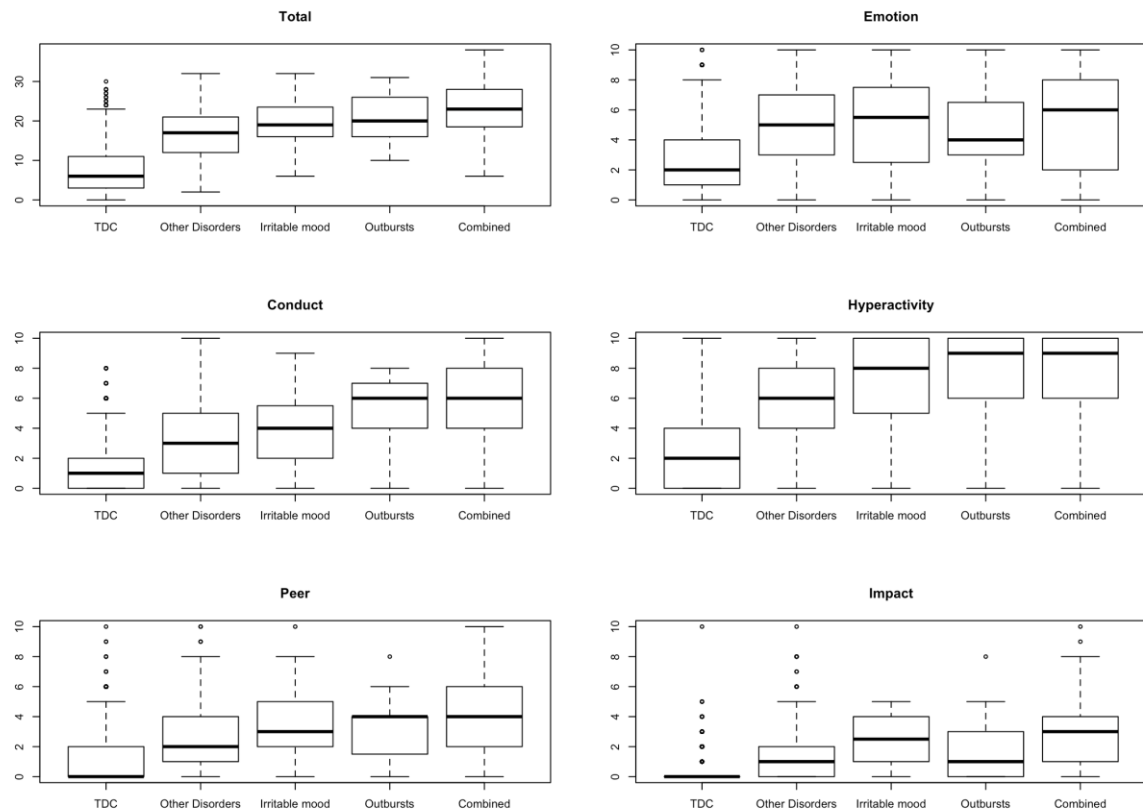

**Supplemental Figure S4** – Comparison of Strengths and Difficulties Questionnaire Scores between Disruptive Mood Dysregulation Disorder, defined using the OR rule, and subjects matched for psychiatric comorbidity.

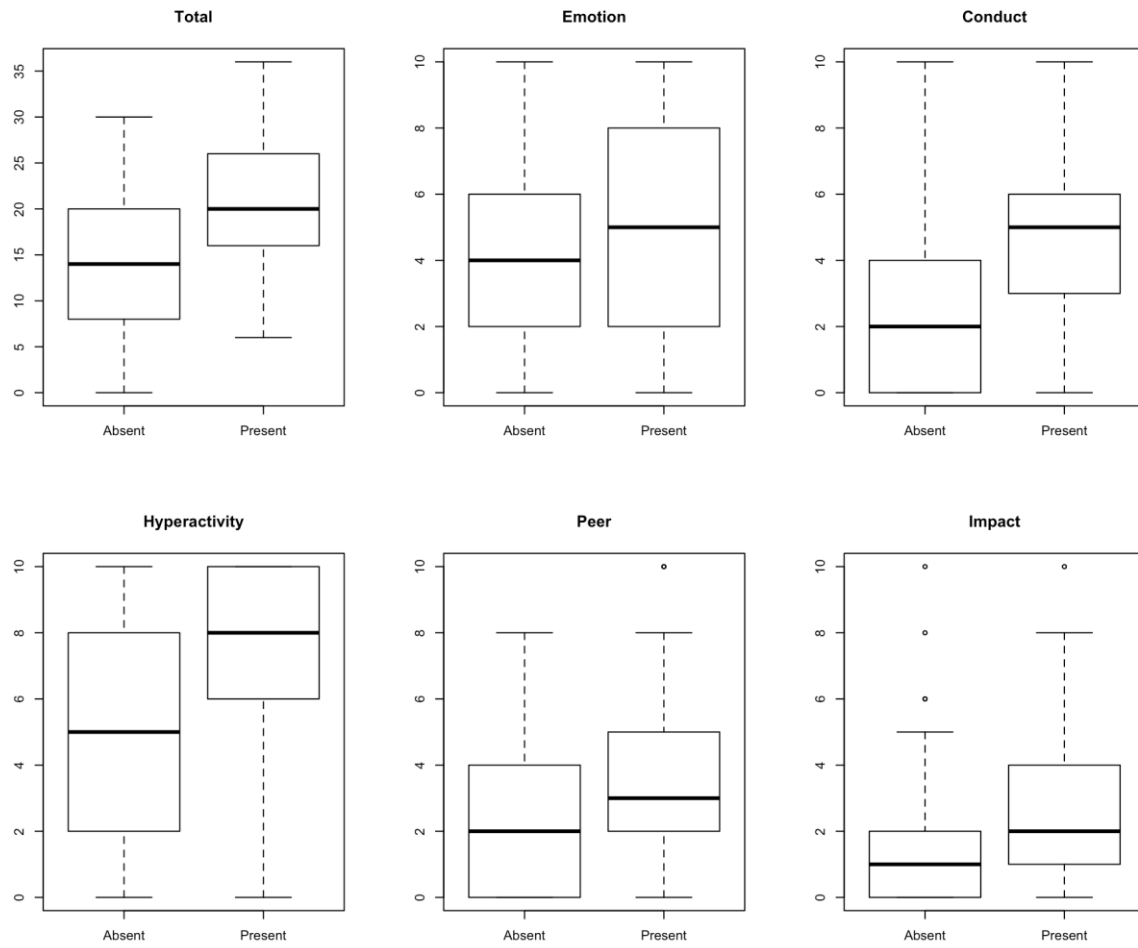



**Supplemental Figure S5** – Comparison between Strengths and Difficulties Questionnaire Scores between Disruptive Mood Dysregulation Disorder, defined using the AND rule, and subjects matched for psychiatric comorbidity.

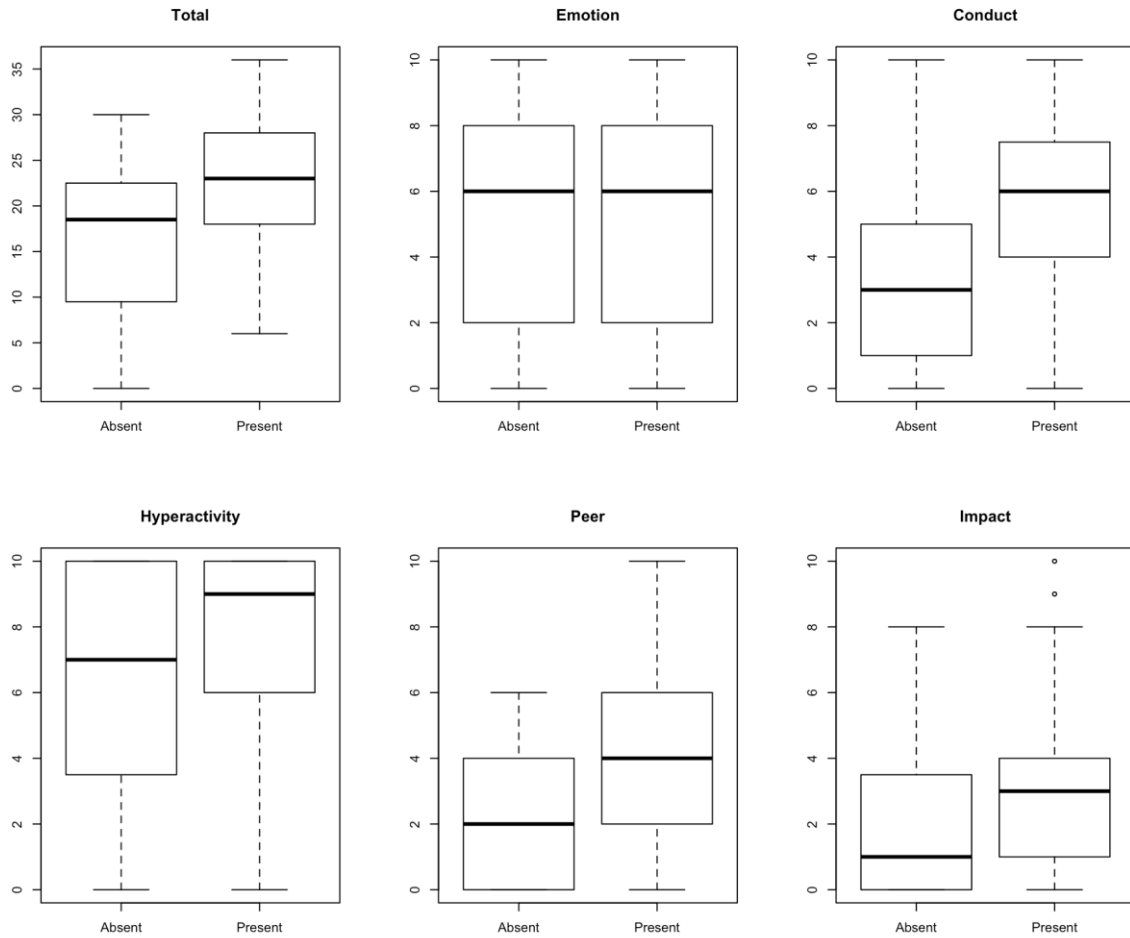

Supplement: Supplementary file [file 19002436-1.pdf]
